# Supplementary material
Source: publisher figshare collection journal article supplement (https://tandf.figshare.com/ndownloader/files/35113544)
Supplement: Supplementary file 1 [file 35113544]

**Table S1** Composition of water and methanolic extracts of *Leucaena* leaves. H = Hawaii, Pe = Peru, MD = Mixed/Dry, P = Present; *essential amino acids

| **Group** | **Mass Positive mode** | **Mass**  **Negative mode** | **Retention time (minutes)** | **H**  **Water extract** | **Pe**  **Water extract** | **MD**  **Water extract** | **H**  **Metanolic**  **extract** | **Pe**  **Methanolic extract** | **MD**  **Methanolic extract** |
| --- | --- | --- | --- | --- | --- | --- | --- | --- | --- |
| **Carbohydrates** |  |  |  |  |  |  |  |  |  |
| Gluconic acid |  | 195,0467 | 3,43 | P | P | P |  |  |  |
| Disaccharides [M+FA] |  | 387,1075 | 3,46 |  |  |  | P | P | P |
| Arabinose |  | 149,0446 | 3,57 |  |  |  | P | P | P |
| Aldaric acid (C6H10O8) |  | 209,0262 | 3,59 | P | P | P |  |  |  |
| Pentose (C5H10O5) |  | 149,0447 | 3,94 | P | P | P |  |  |  |
| Aldaric acid (C6H10O8) |  | 209,0262 | 4,17 | P | P | P |  |  |  |
| Aldopentose |  | 149,0569 | 4,24 | P | P | P |  |  |  |
| **Amino acids** |  |  |  |  |  |  |  |  |  |
| Asparagine | 133,0615 | 131,0462 | 3,12 |  |  |  | P | P | P |
| Mimosine | 199,0726 | 197,0559 | 3,15 | P | P | P | P | P | P |
| Glutamine | 147,0771 |  | 3,16 |  |  |  | P | P | P |
| Allysine | 146,0822 |  | 3,25 | P | P | P | P | P | P |
| Proline | 116,0711 |  | 3,35 |  |  |  | P | P | P |
| Pipecolic acid | 130,0869 |  | 3,58 | P | P | P | P | P | P |
| Phenylalanine* | 166,0871 |  | 4,28 |  |  |  | P | P | P |
| Tetrahydropicolinate | 172,0602 |  | 4,86 |  |  |  | P | P | P |
| Leucine* | 132,1023 |  | 5,11 | P | P |  | P | P | P |
| Tryptophan* | 205,0985 |  | 15,61 |  |  |  | P | P | P |
| **Other** |  |  |  |  |  |  |  |  |  |
| Deamminated isomer of mimosine (C8H9O4) | 184,0619 |  | 4,23 | P | P | P |  |  |  |
| Rabelomycin |  | 337,0741 | 4,94 | P |  | P |  |  |  |
| Fludarabine | 286,0945 |  | 5,24 | P | P | P |  |  |  |
| Anthraquinone | 404,1223 |  | 5,39 | P | P | P |  |  |  |
| Rabelomycin |  | 337,07 | 5,40 |  |  |  | P |  | P |
| Citroside A C19H30O8 [M+Na] | 409,1843 | 421,1613 | 22,96 |  |  |  | P | P | P |
| Artomunoxantrione |  | 443,11 | 27,70 | P | P | P |  |  |  |
| Silybin |  | 481,1128 | 32,42 |  |  |  | P |  | P |
| **Alkaloids** |  |  |  |  |  |  |  |  |  |
| Choline | 104,1071 |  | 2,83 |  |  |  | P | P | P |
| Nipecotic acid | 130,0868 |  | 5,40 |  |  |  | P | P | P |
| **Carboxylic acids** |  |  |  |  |  |  |  |  |  |
| Malic acid |  | 133,012 | 4,36 | P |  | P |  |  |  |
| Citric acid |  | 191,0192 | 4,44 |  | P |  | P | P | P |
| α-Ketoglutaric acid |  | 145,0136 | 5,83 | P | P | P |  |  |  |
| Hydroxy glutarate |  | 147,0295 | 6,30 |  | P | P |  |  |  |
| Succinic acid |  | 117,0188 | 6,38 | P | P | P |  |  |  |
| Maleic acid |  | 115,0037 | 6,56 | P |  | P |  |  |  |
| Fumaric acid |  | 115,0036 | 6,71 | P | P | P |  |  |  |
| Hydroxybutyric acid |  | 103,0400 | 6,98 |  |  | P |  |  |  |
| **Polyphenols** |  |  |  |  |  |  |  |  |  |
| Gallic acid |  | 169,0133 | 8,78 |  |  | P |  |  |  |
| Quinic acid |  | 191,0547 | 12,07 | P | P | P |  |  |  |
| Caffeoyl glucarate isomer |  | 371,0577 | 16,74 |  | P | P |  |  |  |
| Gallic acid 3-O-(6-galloylglucoside) |  | 483,0757 | 19,42 |  |  |  | P | P | P |
| Caffeoyl glucuronide |  | 355,0628 | 19,49 |  | P | P |  |  |  |
| Caffeoyl glucuronide isomer |  | 355,0628 | 19,89 |  | P | P |  |  |  |
| Caffeoyl glucuronide isomer |  | 355,0628 | 20,15 |  | P | P |  |  |  |
| Caffeoyl-hydroxycitric acid |  | 369,0423 | 20,73 | P | P | P |  |  |  |
| Catechin |  | 325,0478 | 20,80 |  |  |  | P |  | P |
| Chlorogenic acid |  | 353,085 | 20,93 |  | P | P |  |  |  |
| Caffeoyl glucuronide isomer |  | 355,0628 | 21,86 | P | P | P |  |  |  |
| Caffeoyl-hydroxycitric acid |  | 369,0423 | 23,67 | P | P | P |  |  |  |
| Epicatechin |  | 289,0702 | 23,70 |  |  |  | P |  | P |
| Epigallocatechin gallate | 459,1054 | 457,0741 | 24,70 |  |  |  |  |  | P |
| Mirecitine 3-rutinoside |  | 625,1373 | 27,44 |  |  |  | P | P | P |
| Rutin | 611,1659 | 609,1395 | 28,97 | P | P | P | P | P | P |
| Myristicin | 465,1067 | 463,0752 | 29,41 |  |  |  | P | P | P |
| Vicenin 2 |  | 593,1453 | 29,91 |  |  |  | P | P | P |
| Apigenin | 271,0644 | 269,0429 | 30,32 | P | P | P |  |  |  |
| Quercetin 3 arabinoside | 435,0786 | 445,41 | 30,45 |  |  |  | P | P | P |
| Quercetin 3 arabinoside | 435,08 | 445.4000 | 30,61 |  |  |  | P | P |  |
| Quercitrin | 449,1113 | 447,0909 | 30,66 | P | P | P | P | P | P |
| Apigenin | 271,0625 | 269,0434 | 31,75 |  | P | P | P | P | P |
| Kaempferol 7-xyloside |  | 417,0803 | 31,79 |  |  |  | P | P | P |
| Quercitrin | 191,02 |  | 31,92 | P |  | P |  |  |  |
| Kaempferol-3-O-α-rhamnopyranoside |  | 431,0959 | 32,03 |  |  |  | P | P | P |
| Geraldone | 285,0793 | 283,0615 | 32,35 |  |  |  | P | P | P |
| 7,4'-Dihydroxyflavone |  | 253,0495 | 34,09 |  |  |  | P | P | P |
| Apigenin glucuronide methyl |  | 465,1159 | 36,18 |  |  |  | P | P | P |
| Cyanidin |  | 285,0396 | 36,92 |  |  |  | P | P | P |
| Quercetin-3-O-α-rhamnopyranoside |  | 301,0337 | 37,32 |  |  |  | P | P | P |
